# Supplementary material for: Transformation of Amorphous Terbium Metal–Organic Framework on Terbium Oxide TbOx(111) Thin Film on Pt(111) Substrate: Structure of TbxOy Film
Source: MDPI journal article supplement (doi:10.3390/nano12162817), 2022-08-17
Supplement: s1 [file s1]

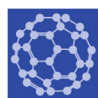

## Supplementary Material

# Transformation of Amorphous Terbium Metal–Organic Framework on Terbium Oxide $\text{TbO}_x(111)$ Thin Film on Pt(111) Substrate: Structure of $\text{Tb}_x\text{O}_y$ Film

Helena Brunckova <sup>1,\*</sup>, Erika Mudra <sup>1</sup>, Magdalena Streckova <sup>1</sup>, Lubomir Medvecký <sup>1</sup>, Tibor Sopcak <sup>1</sup>, Ivan Shepa <sup>1</sup>, Alexandra Kovalcikova <sup>1</sup>, Maksym Lisnichuk <sup>1</sup> and Hristo Kolev <sup>2</sup>

<sup>1</sup> Institute of Materials Research, Slovak Academy of Sciences, Watsonova 47, 040 01 Kosice, Slovakia

<sup>2</sup> Institute of Catalysis, Bulgarian Academy of Sciences, Acad. G. Bonchev St., BU-1113 Sofia, Bulgaria

\* Correspondence: hbrunckova@saske.sk; Tel.: +421-55-7922-455

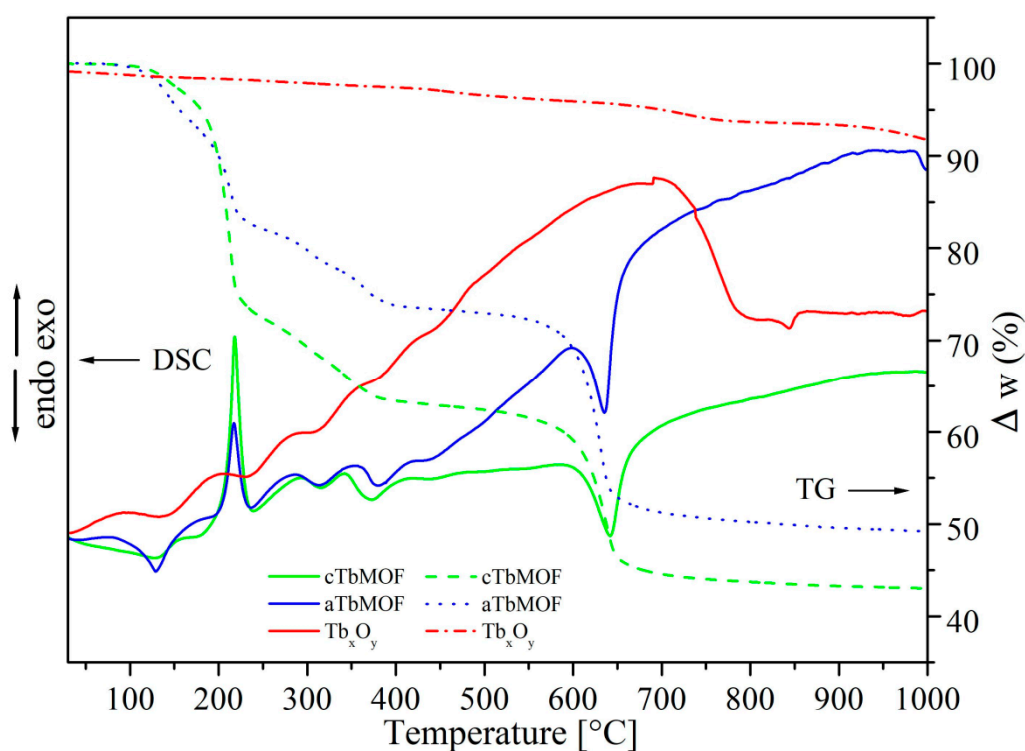

**Figure S1.** DSC/TG curves of crystalline (cTbMOF), amorphous (aTbMOF), and amorphous aTbMOF, heated at 450 °C ( $\text{Tb}_x\text{O}_y$ ) powders.

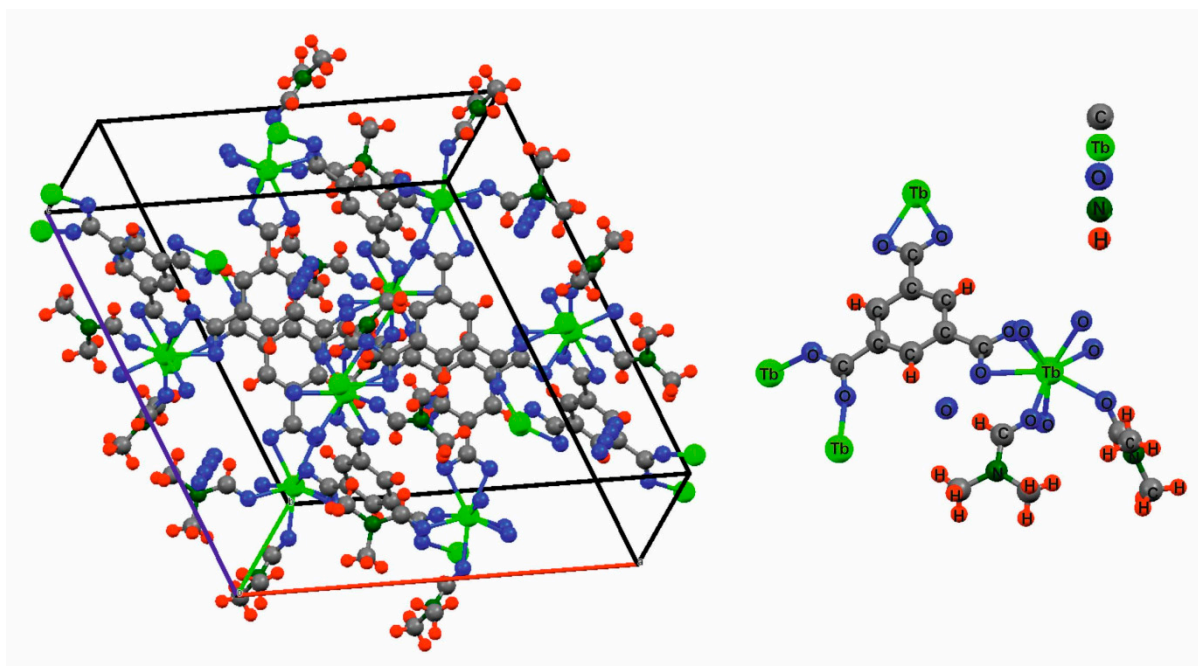

**Figure S2.** Coordination environment of Tb(BTC)(DMF)<sub>2</sub>(H<sub>2</sub>O); TbMOF.

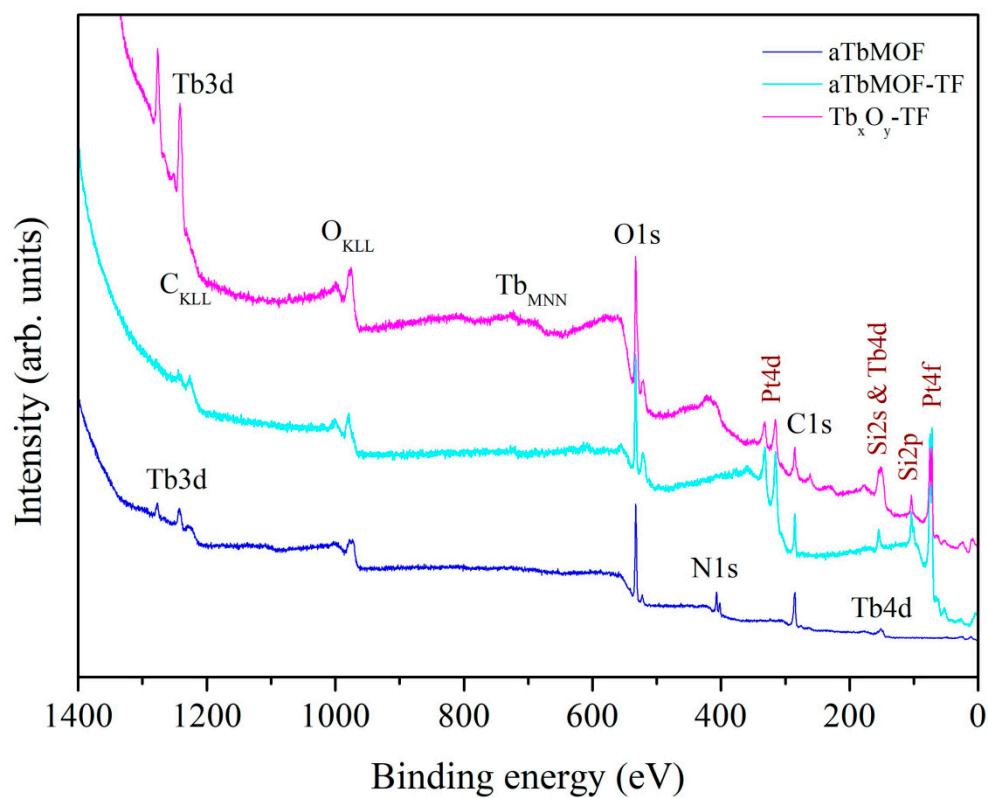

**Figure S3.** XPS survey spectra of amorphous powder (aTbMOF), amorphous thin film (aTbMOF-TF), and Tb<sub>x</sub>O<sub>y</sub>-TF on SiO<sub>2</sub>/Si substrates with Pt interlayer.

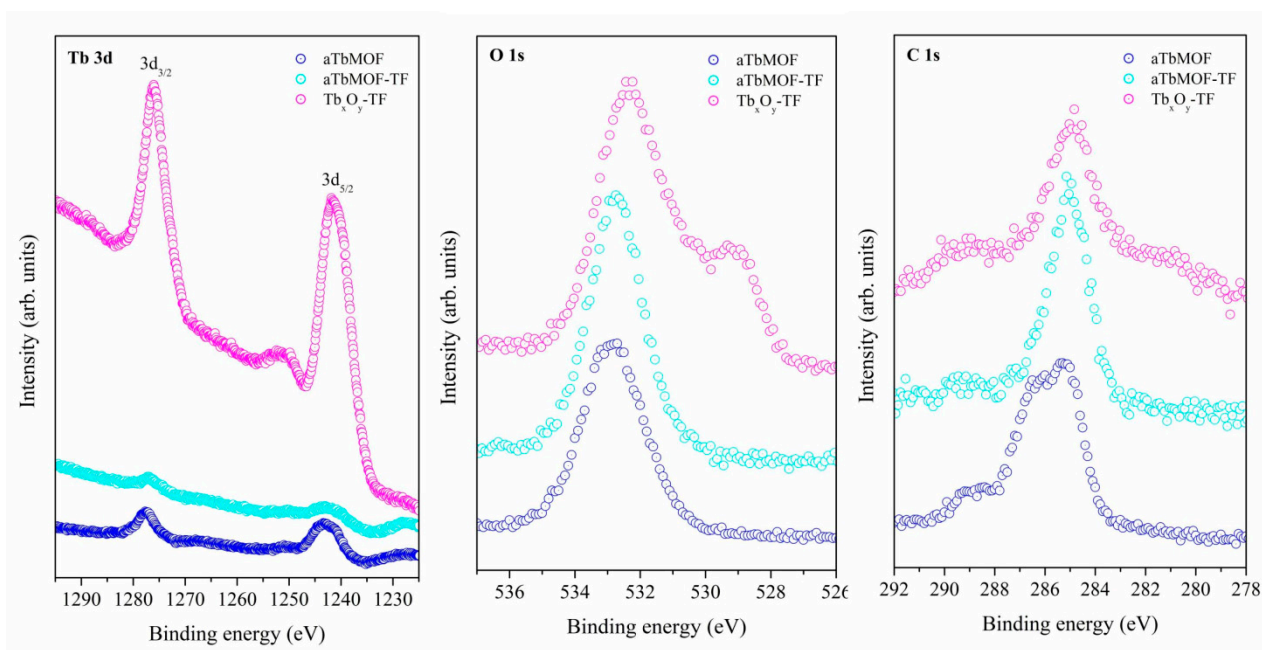

**Figure S4.** HR XPS spectra of Tb 3d, O 1s, and C 1s for amorphous aTbMOF powder and aTbMOF-TF film and Tb<sub>x</sub>O<sub>y</sub>-TF film.

**Table S1.** XPS elemental atomic % of aTbMOF, aTbMOF-TF and Tb<sub>x</sub>O<sub>y</sub>-TF samples.

| Sample                             | Tb   | O     | C     | N     | Pt    | Si    |
|------------------------------------|------|-------|-------|-------|-------|-------|
| aTbMOF                             | 2.00 | 35.76 | 45.23 | 17.00 | -     | -     |
| aTbMOF-TF                          | 0.56 | 30.22 | 30.25 | -     | 20.37 | 18.61 |
| Tb <sub>x</sub> O <sub>y</sub> -TF | 9.87 | 44.34 | 27.29 | -     | 6.61  | 11.89 |

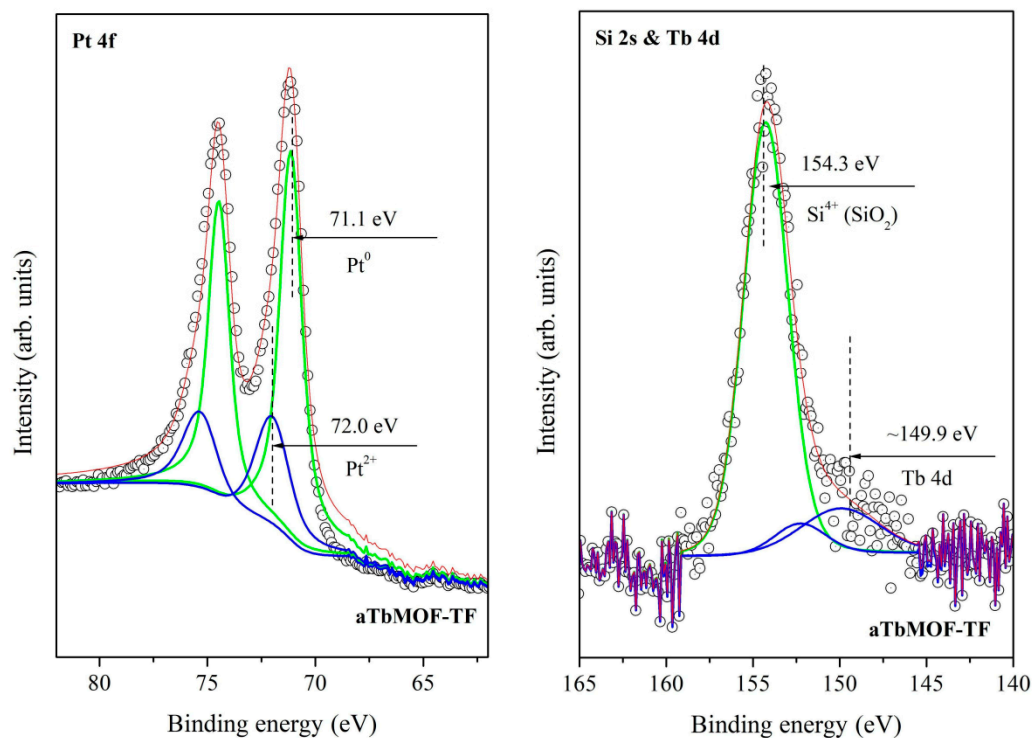

**Figure S5.** HR XPS spectra of Pt 4f and Si 2s & Tb 4d for amorphous aTbMOF-TF thin film.

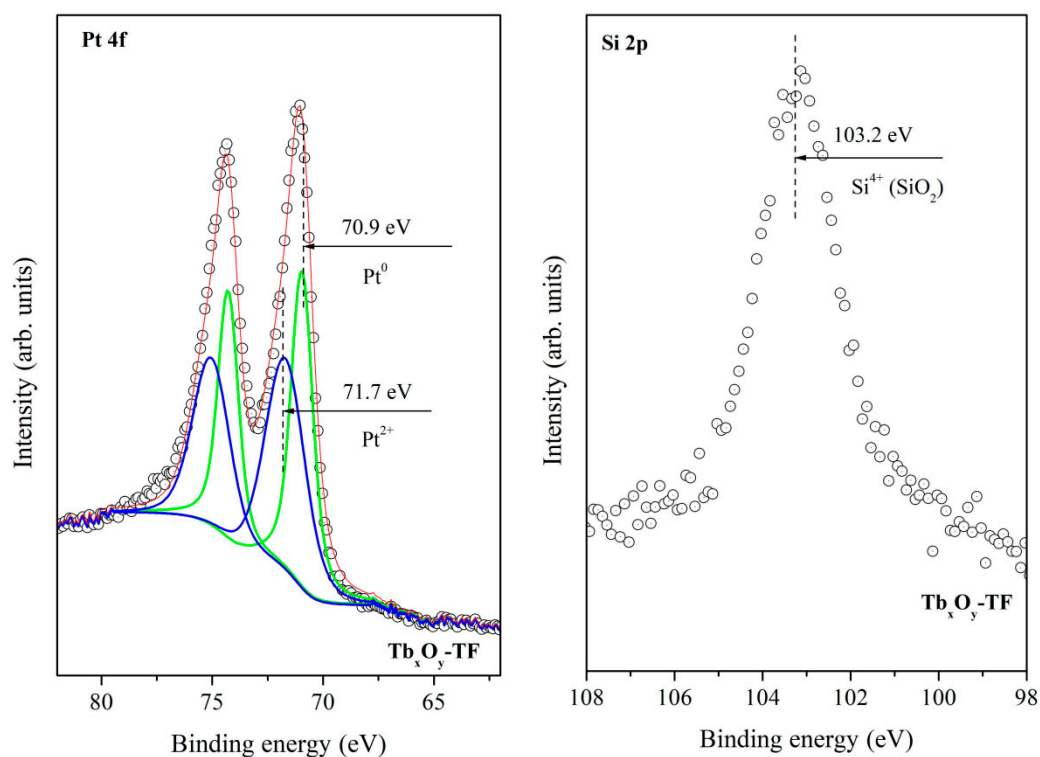

Figure S6. HR XPS spectra of Pt 4f and Si 2p (substrate) for  $\text{Tb}_x\text{O}_y\text{-TF}$  thin film.

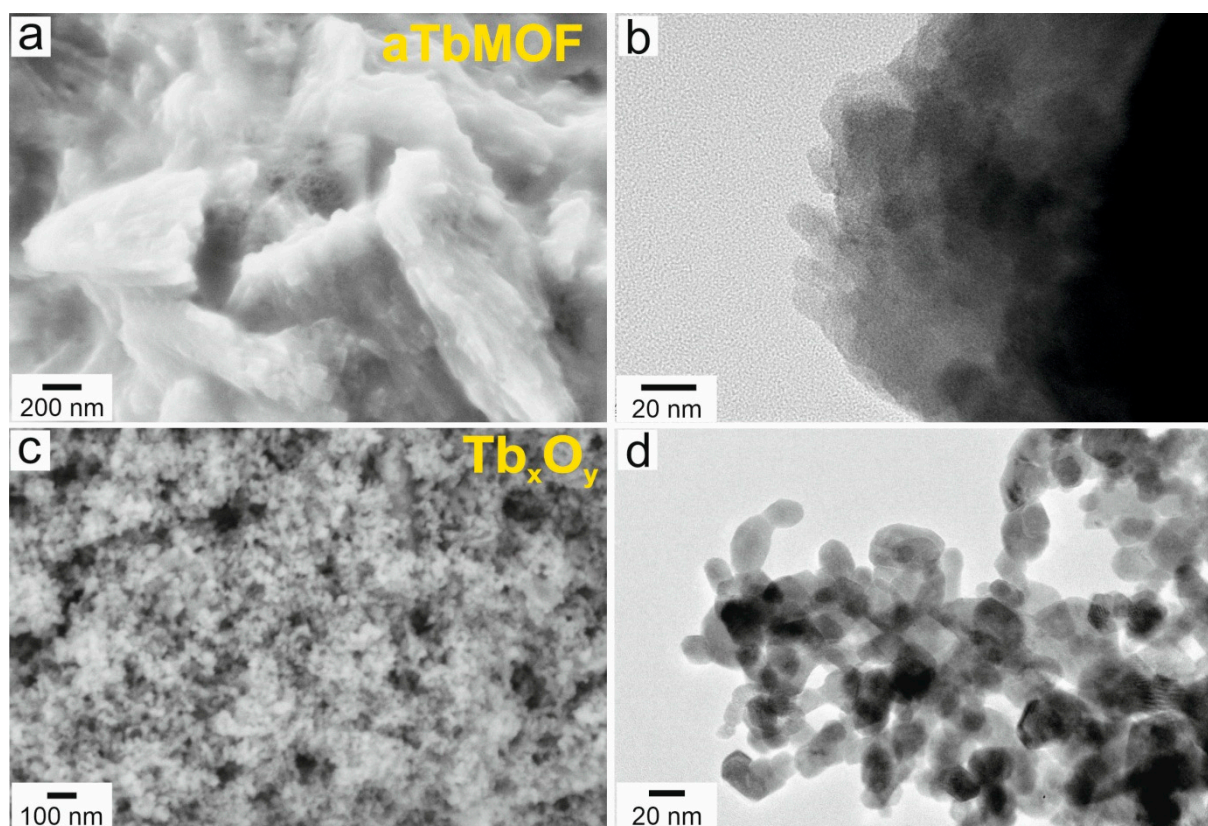

Figure S7. SEM and TEM images of (a,b) amorphous aTbMOF and (c,d)  $\text{Tb}_x\text{O}_y$  powders.



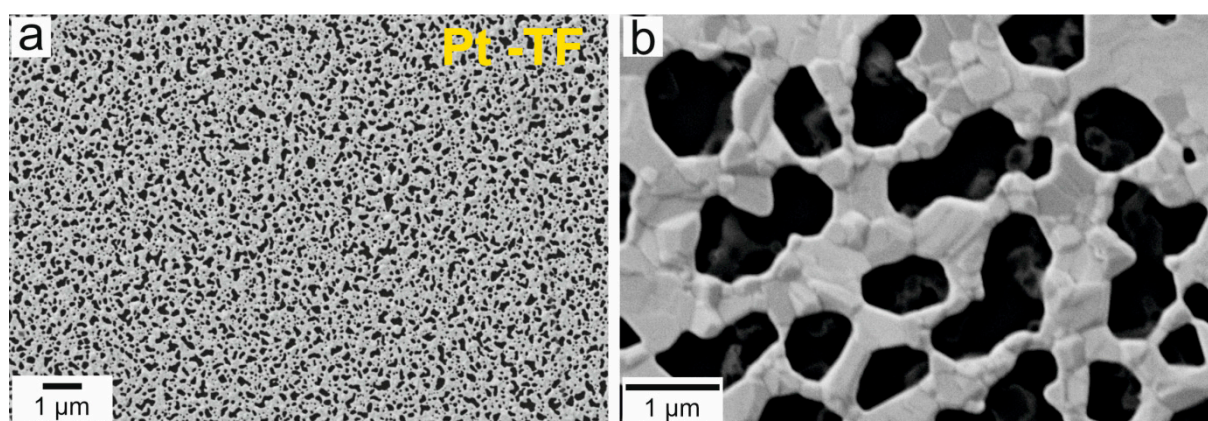

**Figure S8.** SEM microstructures of Pt/SiO<sub>2</sub>/Si substrate sample (a) as-deposited and (b) annealed at 450  $^{\circ}\text{C}$ .

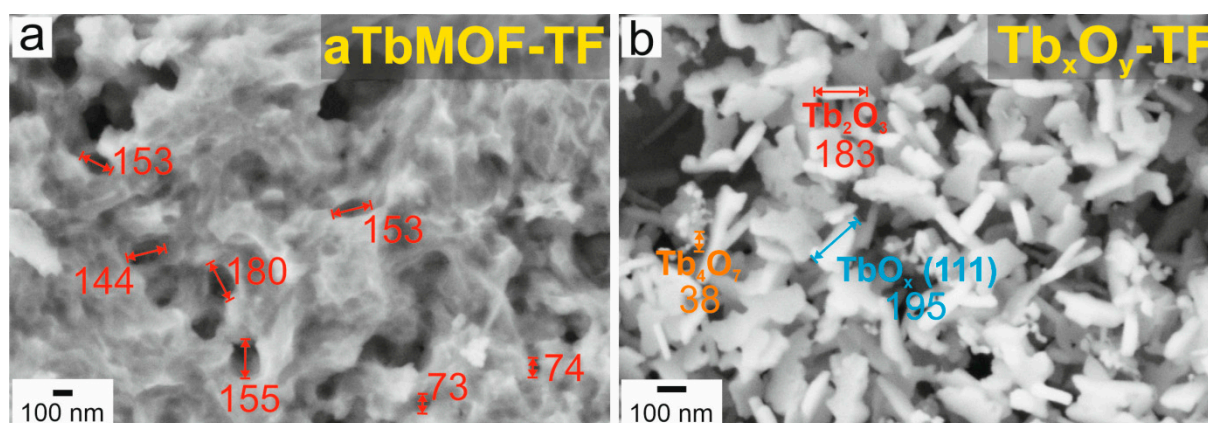

**Figure S9.** SEM surface microstructures of (a) aTbMOF-TF (with pore sizes) and (b) Tb<sub>x</sub>O<sub>y</sub>-TF thin films (with particle sizes).

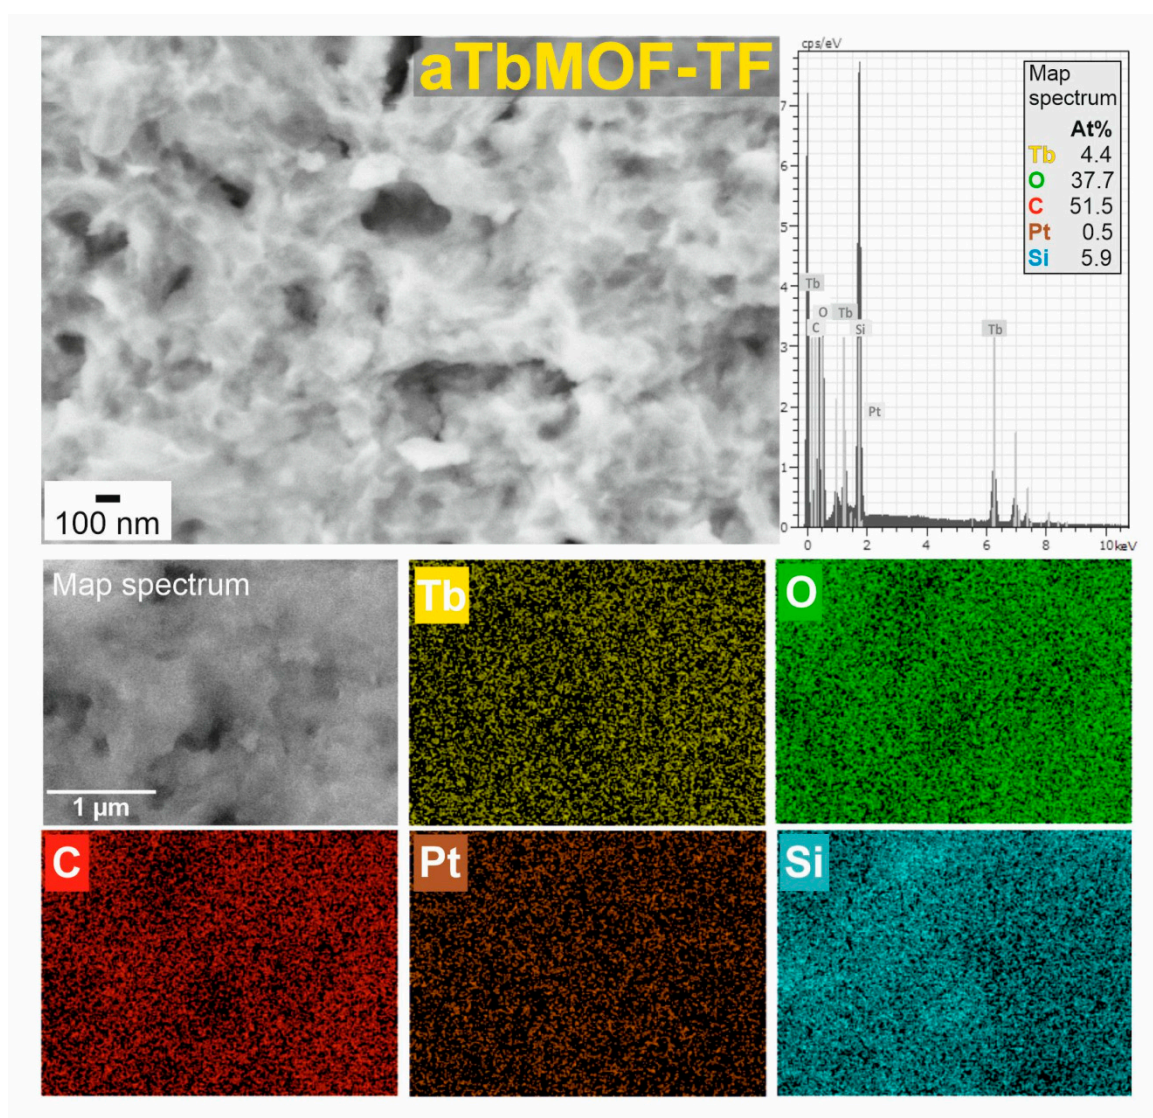

**Figure S10.** SEM surface microstructures and EDS elemental mapping of the amorphous aTbMOF-TF thin film.



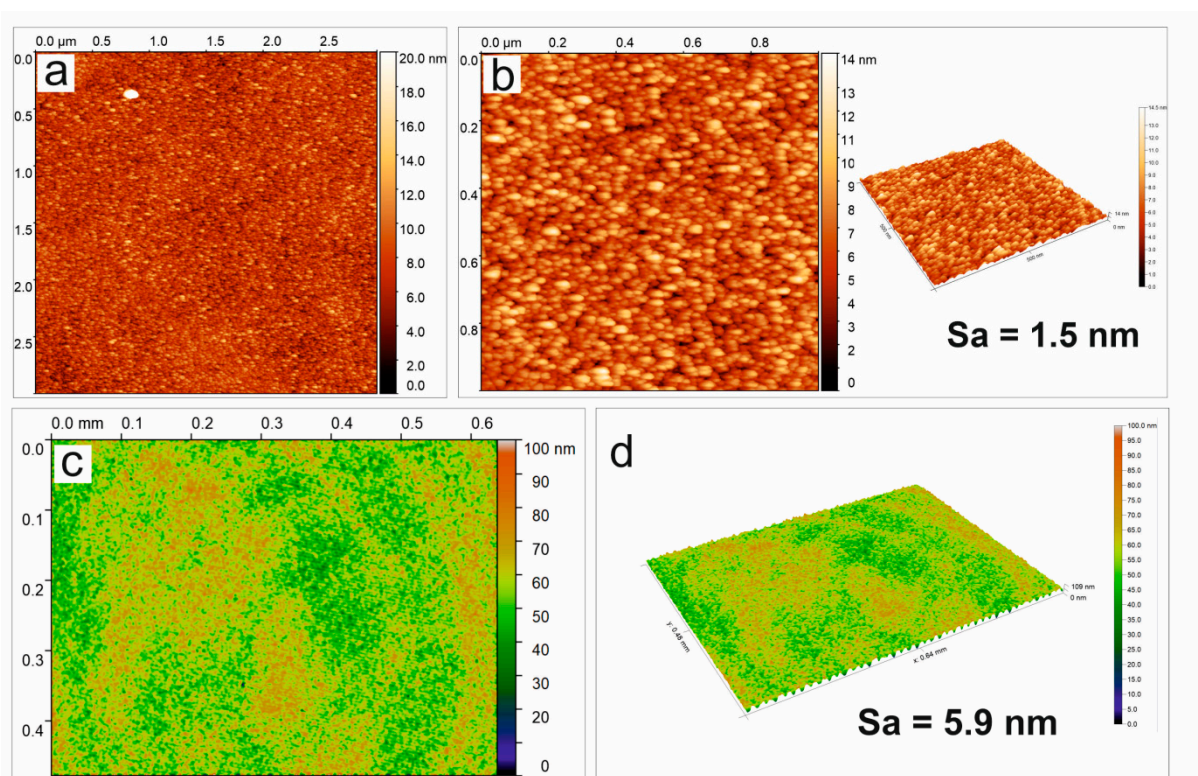

**Figure S11.** (a,b) 2D and 3D-AFM topography and (c,d) Confocal microscopy (CM) scans of the Pt/SiO<sub>2</sub>/Si substrate sample in isometric and 3D representations of Pt-interlayer.
